# Supplementary material for: COVID-19 in children in NSW, Australia, during the 2021 Delta outbreak: Severity and Disease spectrum
Source: bioRxiv or medRxiv preprint supplement (doi:10.1101/2021.12.27.21268348), 2021-12-29
Supplement: Supplementary file [file media-1.pdf]

**Supplementary materials:****Title:**

COVID-19 in children in NSW, Australia, during the 2021 Delta outbreak: Severity and Disease spectrum

**Authors:**

Phoebe Williams\*<sup>1,2,3,4</sup>, Archana Koirala\*<sup>1,2,3</sup>, Gemma Saravanos\*<sup>1,3</sup>, Laura Lopez\*<sup>2</sup>, Catherine Glover<sup>2</sup>, Ketaki Sharma<sup>1,2</sup>, Tracey Williams<sup>1,3</sup>, Emma Carey<sup>1,2</sup>, Nadine Shaw<sup>1</sup>, Emma Dickins<sup>1</sup>, Neela Sitaram<sup>1</sup>, Joanne Ging<sup>1</sup>, Paula Bray<sup>1</sup>, Nigel Crawford<sup>5</sup>, Brendan McMullan<sup>1,4</sup>, Kristine Macartney<sup>1,2,3</sup>, Nicholas Wood<sup>1,2,3</sup>, Beth Fulton<sup>1</sup>, Christine Lau<sup>1</sup>, Philip N Britton<sup>1,2,3</sup>.

\*Contributed equally

**Affiliations:**

1. Sydney Children's Hospitals Network;
2. National Centre for Immunisation Research and Surveillance;
3. Faculty of Medicine and Health, University of Sydney;
4. School of Women's and Children's Health, University of New South Wales; NSW, Australia.
5. Royal Children's Hospital and Murdoch Children's Research Institute, Melbourne, Victoria, Australia.

**Correspondance :**

A/Prof Philip Britton

The Children's Hospital at Westmead Clinical School

Locked Bag 4001, Westmead NSW Australia 2145

Email: [philip.britton@health.nsw.gov.au](mailto:philip.britton@health.nsw.gov.au)

## Supplementary Methods:

Data sources and data use for calculation of rates.

| Data Source                                             | Numerator                                          | Denominator                                 | Metric                               |
|---------------------------------------------------------|----------------------------------------------------|---------------------------------------------|--------------------------------------|
| Paediatric Active Enhanced Disease Surveillance (PAEDS) | SARS-CoV-2 associated ICU Admissions at SCHN       |                                             | COVID-19 ICU admission 'rate'        |
| PAEDS                                                   | PIMS-TS Admissions at SCHN                         |                                             | PIMS-TS admission 'rate'*            |
| NSW Ministry of Health                                  |                                                    | Statewide age-specific SARS-CoV-2 infection |                                      |
| PAEDS                                                   | SARS-CoV-2 associated 'Medical' Admissions at SCHN |                                             | COVID-19 hospital admission 'rate'   |
| SCHN 'Home in the Hospital' program (Social admissions) | SARS-CoV-2 associated Social Admissions at SCHN    |                                             | COVID-19 social vulnerability 'rate' |
| SCHN VirtualKIDS-CORT                                   |                                                    | SARS-CoV-2 associated Admissions at SCHN    |                                      |

Abbreviations: ICU=intensive care unit; NSW=New South Wales, Australia; PIMS-TS= paediatric inflammatory multi-system syndrome temporally associated with SARS-CoV-2; SCHN=Sydney Children's Hospital Network

\*PIMS-TS = paediatric inflammatory multi-system syndrome temporally associated with SARS-CoV-2 infection; admission rate calculated using data cut of at 30 September, 2021 given lag time for this 'post-infectious' clinical manifestation.

**Supplementary Results:**

**Supplementary Table 1:** Case fatality and admission rates overall and by age group and severity of disease amongst cases of SARS-CoV-2 infection managed by SCHN hospitals June - October 2021.

|                                                 | Rate per 100 infections [95%CI if applicable] |                    |                  |                  |                  |                  |
|-------------------------------------------------|-----------------------------------------------|--------------------|------------------|------------------|------------------|------------------|
|                                                 | 0-15 years                                    | 0-5 months         | 6-23 months      | 2-4 years        | 5-11 years       | 12-15 years      |
| <b>Death</b><br>(n=1)                           | 0.005                                         | -                  | -                | -                | -                | 0.02             |
| <b>ICU Admit</b><br>(n=15)                      | 0.09                                          | 0.20               | 0.06             | -                | 0.05             | 0.21             |
| <b>Medical Admit +<br/>ICU Admit</b><br>(n=165) | 1.38<br>[1.17 - 1.59]                         | 12.0<br>[8.9-15.1] | 2.3<br>[1.5-3.2] | 0.9<br>[0.5-1.3] | 0.5<br>[0.3-0.7] | 1.4<br>[1.0-1.8] |
| <b>PIMS-TS*</b><br>(n=7)                        | 0.04                                          | 0.20               | 0.06             | 0.09             | 0.03             | -                |

\*PIMS-TS=paediatric inflammatory multi-system syndrome temporally associated with SARS-CoV-2 infection; admission rate calculated using notification data cut of at 30 September, 2021 given lag time for this 'post-infectious' clinical manifestation.

**Supplementary Table 2.** Full list of clinical features, treatment and outcomes among cases of SARS-CoV-2 infection admitted to SCHN by highest acuity level of care amongst children aged 0-15 years managed through SCHN, June 1 - October 31, 2021.

| Characteristic                     | VirtualKIDS-CORT<br>sample,<br>N = 344 <sup>1</sup> | Medical (non-ICU)<br>admission,<br>N = 150 <sup>1</sup> | ICU<br>admission,<br>N = 15 <sup>1</sup> | P value <sup>2</sup> |
|------------------------------------|-----------------------------------------------------|---------------------------------------------------------|------------------------------------------|----------------------|
| <b>Symptomatic</b>                 | 233 / 344 (68%)                                     | 150 / 150 (100%)                                        | 15 / 15 (100%)                           | <b>&lt;0.001</b>     |
| Fever                              | 30 / 219 (14%)                                      | 99 / 144 (69%)                                          | 12 / 15 (80%)                            | <b>&lt;0.001</b>     |
| Cough                              | 116 / 232 (50%)                                     | 108 / 149 (72%)                                         | 12 / 15 (80%)                            | <b>&lt;0.001</b>     |
| Rhinorrhoea                        | 117 / 232 (50%)                                     | 90 / 148 (61%)                                          | 8 / 15 (53%)                             | 0.14                 |
| Ear pain                           | 2 / 230 (0.9%)                                      | 1 / 131 (0.8%)                                          | 0 / 14 (0%)                              | >0.9                 |
| Oropharyngeal pain                 | 51 / 230 (22%)                                      | 14 / 130 (11%)                                          | 5 / 14 (36%)                             | <b>0.005</b>         |
| Dyspnoea                           | 6 / 232 (2.6%)                                      | 43 / 146 (29%)                                          | 7 / 15 (47%)                             | <b>&lt;0.001</b>     |
| Wheeze                             | 2 / 232 (0.9%)                                      | 6 / 145 (4.1%)                                          | 0 / 15 (0%)                              | 0.10                 |
| Chest pain                         | 1 / 230 (0.4%)                                      | 15 / 130 (12%)                                          | 1 / 14 (7.1%)                            | <b>&lt;0.001</b>     |
| Chest indraw                       | 0 / 232 (0%)                                        | 6 / 146 (4.1%)                                          | 0 / 15 (0%)                              | <b>0.005</b>         |
| Myalgia                            | 31 / 230 (13%)                                      | 11 / 128 (8.6%)                                         | 6 / 14 (43%)                             | <b>0.004</b>         |
| Arthralgia                         | 12 / 230 (5.2%)                                     | 5 / 128 (3.9%)                                          | 2 / 14 (14%)                             | 0.2                  |
| Fatigue/malaise                    | 66 / 232 (28%)                                      | 56 / 143 (39%)                                          | 10 / 15 (67%)                            | <b>0.003</b>         |
| Anosmia                            | 23 / 231 (10.0%)                                    | 15 / 129 (12%)                                          | 3 / 14 (21%)                             | 0.3                  |
| Hypogeusia                         | 29 / 230 (13%)                                      | 14 / 129 (11%)                                          | 4 / 14 (29%)                             | 0.2                  |
| Vomiting/nausea                    | 21 / 232 (9.1%)                                     | 52 / 145 (36%)                                          | 7 / 15 (47%)                             | <b>&lt;0.001</b>     |
| Headache                           | 70 / 230 (30%)                                      | 32 / 129 (25%)                                          | 8 / 14 (57%)                             | <b>0.042</b>         |
| Diarrhoea                          | 23 / 232 (9.9%)                                     | 42 / 147 (29%)                                          | 7 / 15 (47%)                             | <b>&lt;0.001</b>     |
| Confusion/altered<br>consciousness | 0 / 232 (0%)                                        | 4 / 145 (2.8%)                                          | 3 / 15 (20%)                             | <b>&lt;0.001</b>     |
| Seizure                            | 0 / 232 (0%)                                        | 2 / 145 (1.4%)                                          | 1 / 15 (6.7%)                            | <b>0.020</b>         |
| Abdominal pain                     | 11 / 231 (4.8%)                                     | 19 / 132 (14%)                                          | 2 / 14 (14%)                             | <b>0.003</b>         |
| Conjunctivitis                     | 15 / 232 (6.5%)                                     | 11 / 145 (7.6%)                                         | 0 / 15 (0%)                              | 0.7                  |
| Rash                               | 10 / 232 (4.3%)                                     | 6 / 145 (4.1%)                                          | 3 / 15 (20%)                             | 0.055                |
| Ulcers                             | 1 / 232 (0.4%)                                      | 0 / 145 (0%)                                            | 0 / 15 (0%)                              | >0.9                 |
| Lymphadenopathy                    | 0 / 232 (0%)                                        | 3 / 145 (2.1%)                                          | 0 / 15 (0%)                              | 0.11                 |
| Bleeding/haemorrhage               | 0 / 232 (0%)                                        | 2 / 145 (1.4%)                                          | 1 / 15 (6.7%)                            | <b>0.020</b>         |
| Other <sup>3</sup>                 | 19 / 232 (8.2%)                                     | 77 / 149 (52%)                                          | 10 / 15 (67%)                            | <b>&lt;0.001</b>     |
| <b>Co-pathogen detected</b>        | 0 / 343 (0%)                                        | 9 / 150 (6.0%)                                          | 2 / 15 (13%)                             | <b>&lt;0.001</b>     |
| <b>Medication provided</b>         |                                                     |                                                         |                                          |                      |
| Antibiotics                        | 1 / 50 (2.0%)                                       | 49 / 116 (42%)                                          | 13 / 15 (87%)                            | <b>&lt;0.001</b>     |
| Antivirals                         | 0 / 50 (0%)                                         | 1 / 116 (0.9%)                                          | 8 / 15 (53%)                             | <b>&lt;0.001</b>     |
| Antifungals                        | 0 / 50 (0%)                                         | 1 / 115 (0.9%)                                          | 2 / 15 (13%)                             | <b>0.019</b>         |
| Corticosteroids                    | 0 / 50 (0%)                                         | 18 / 116 (16%)                                          | 14 / 15 (93%)                            | <b>&lt;0.001</b>     |
| Systemic anticoagulation           | NA                                                  | 6 / 115 (5.2%)                                          | 10 / 15 (67%)                            | <b>&lt;0.001</b>     |
| <b>Respiratory support</b>         |                                                     |                                                         |                                          | <b>&lt;0.001</b>     |
| None                               | NA                                                  | 134 / 144 (93%)                                         | 1 / 15 (6.7%)                            |                      |
| Low flow oxygen                    | NA                                                  | 7 / 144 (4.9%)                                          | 2 / 15 (13%)                             |                      |
| High flow oxygen                   | NA                                                  | 3 / 144 (2.1%)                                          | 2 / 15 (13%)                             |                      |
| Non-invasive ventilation           | NA                                                  | 0 / 144 (0%)                                            | 3 / 15 (20%)                             |                      |
| Invasive ventilation               | NA                                                  | 0 / 144 (0%)                                            | 7 / 15 (47%)                             |                      |
| <b>Length of stay (days)</b>       | NA                                                  | 2 (1, 8)                                                | 7 (4, 11)                                | <b>0.015</b>         |
| <b>Death</b>                       | 0 / 344 (0%)                                        | 0 / 150 (0%)                                            | 1 / 15 (6.7%)                            | <b>0.029</b>         |

Boldfaced P values are significant at an alpha level of 0.05. Abbreviations: ICU, intensive care unit. Numerator and denominator data source is PAEDS. Denominators less than the sample size (N) are due to missing data.

<sup>1</sup>n / N (%);<sup>2</sup>Fisher's exact test; Pearson's Chi-squared test; <sup>3</sup>Heterogeneous mix of symptoms.

**Supplementary Figure 1.** Proportion of children with symptoms ( $n \geq 10^*$ ) among cases of acute SARS-CoV-2 infection admitted to SCHN by highest acuity level of care amongst children aged 0-15 years managed through SCHN, June 1 - October 31, 2021.

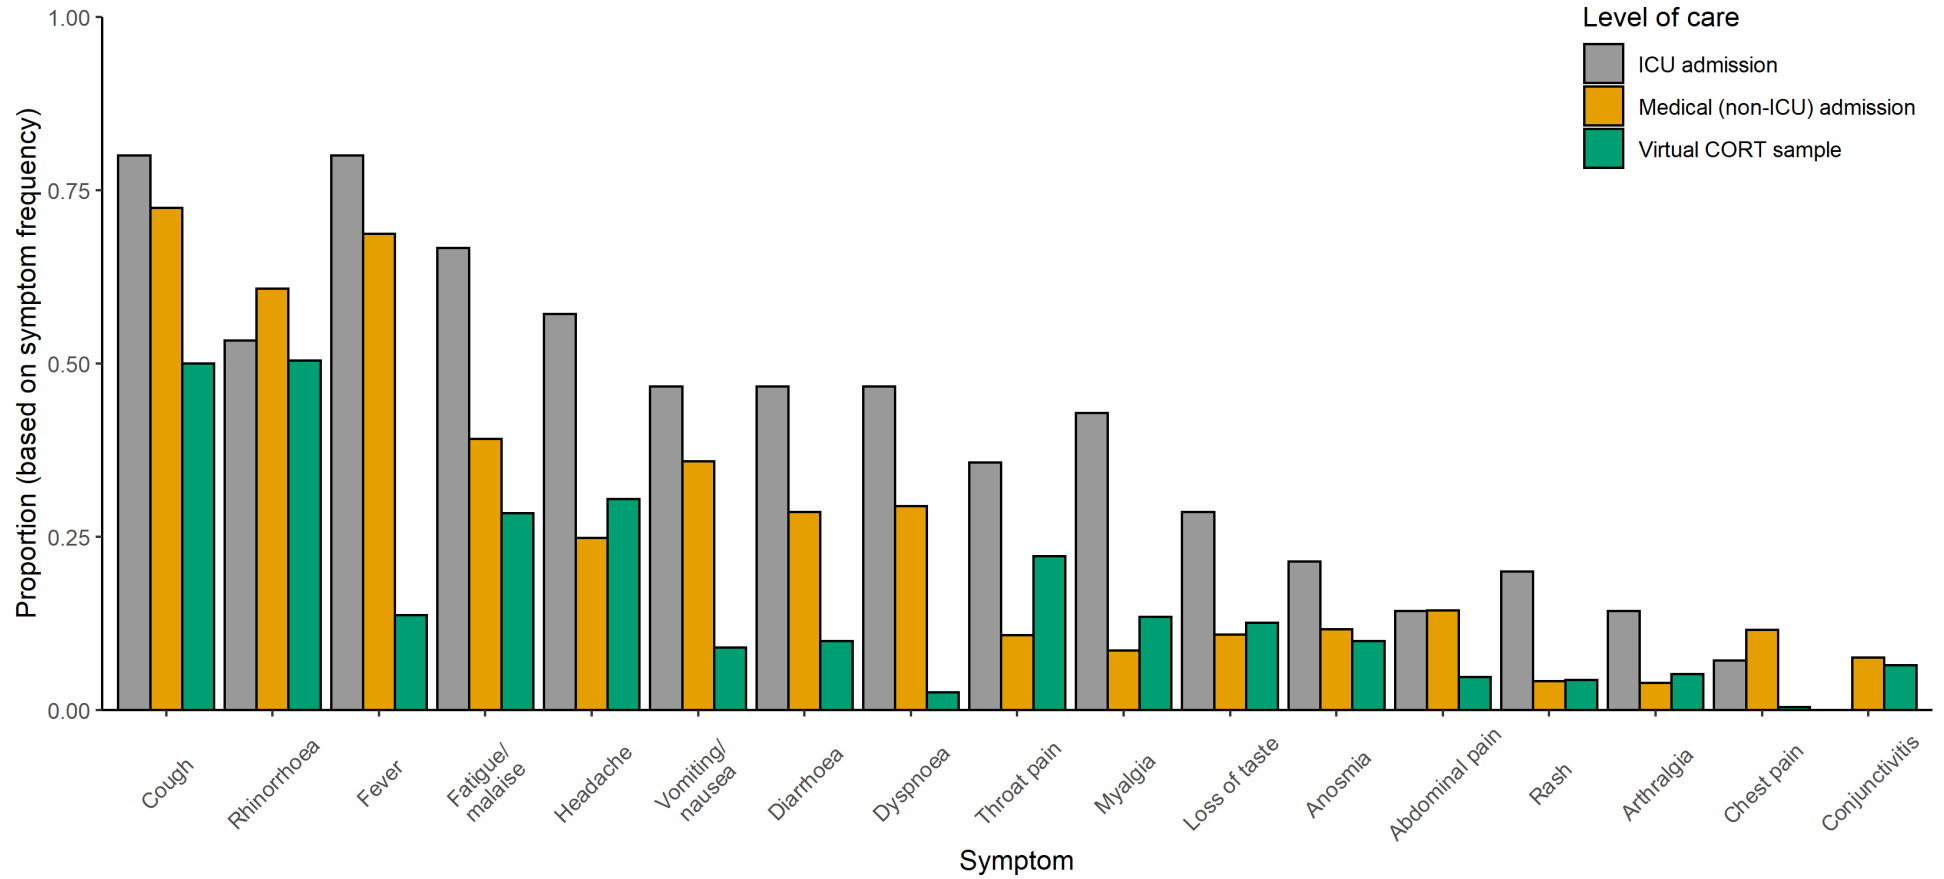

\*Excluded from figure: Wheeze ( $n = 8$ ), Chest indraw ( $n = 6$ ), Confusion/altered consciousness ( $n = 7$ ), Seizure ( $n = 3$ ), Ulcer ( $n = 1$ ), Lymphadenopathy ( $n = 3$ ), Haemorrhage ( $n = 3$ ).

**Supplementary Figure 2.** Proportion of symptoms by age group ( $n \geq 10^*$ ) among cases of acute SARS-CoV-2 infection (hospitalised (non-ICU and ICU) and VirtualKIDS-CORT) managed through SCHN, June 1 - October 31, 2021.

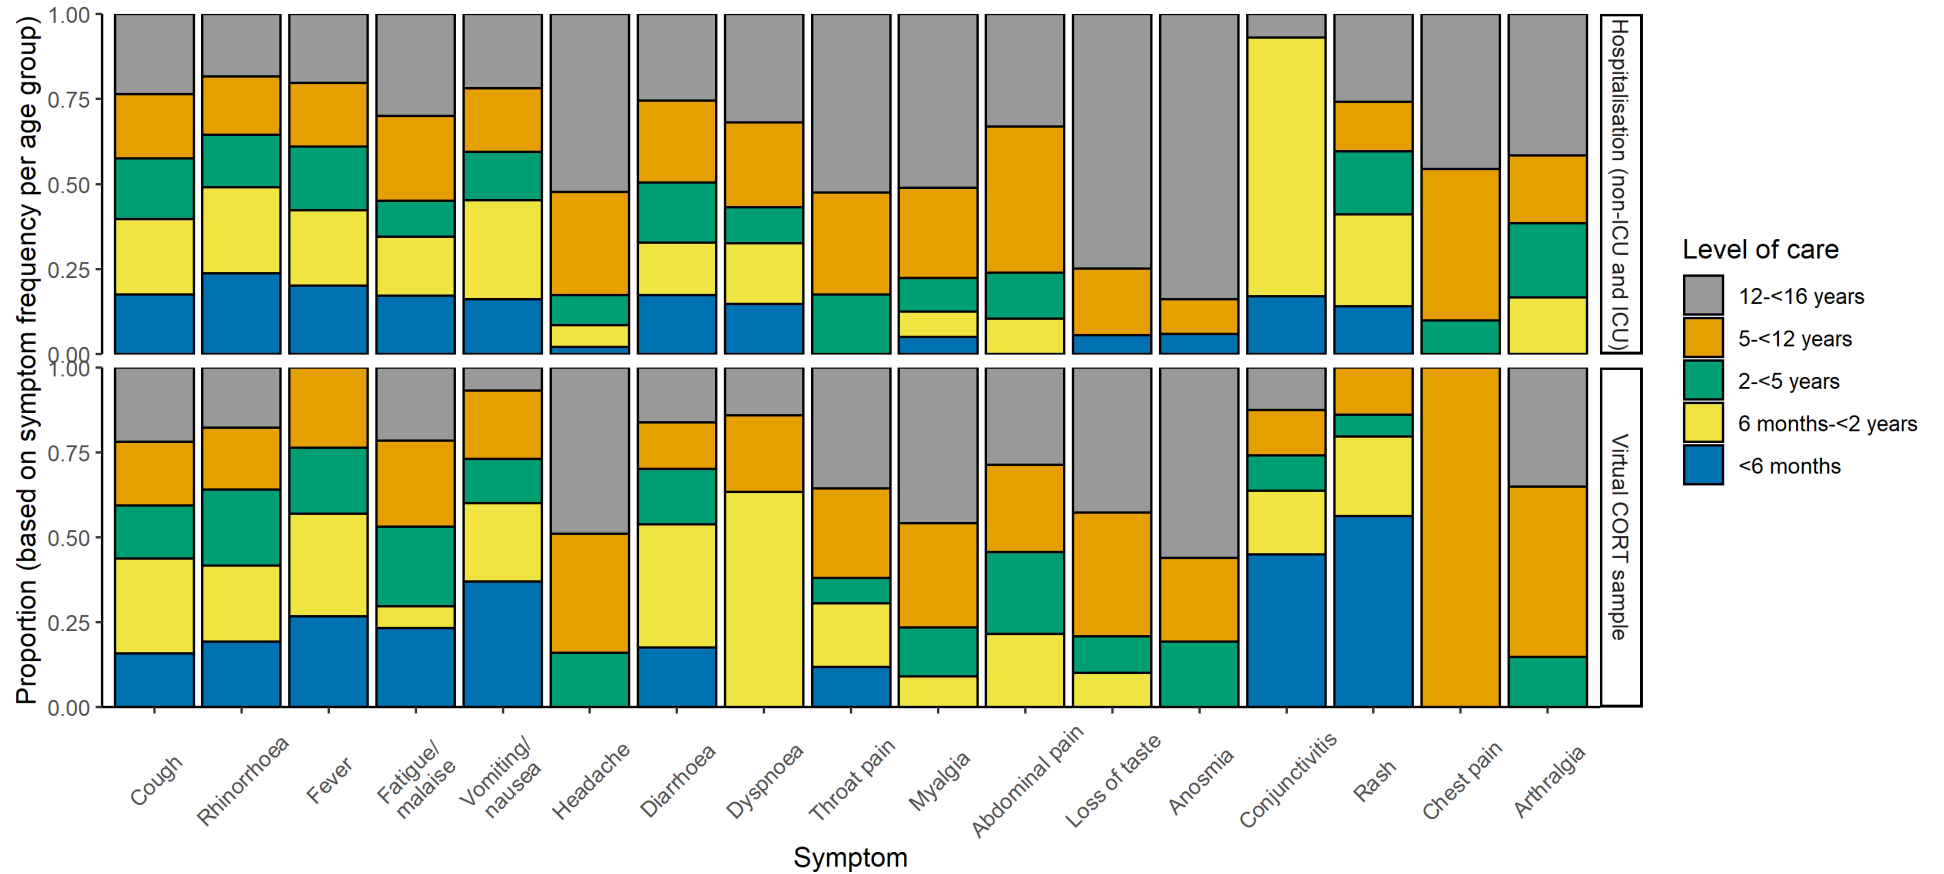

\*Excluded from figure: Wheeze ( $n = 8$ ), Chest indraw ( $n = 6$ ), Confusion/altered consciousness ( $n = 7$ ), Seizure ( $n = 3$ ), Ulcer ( $n = 1$ ), Lymphadenopathy ( $n = 3$ ), Haemorrhage ( $n = 3$ ).
